# Supplementary material for: Highly sensitive explosive sensing by “aggregation induced phosphorescence” active cyclometalated iridium(iii) complexes
Source: Royal Society of Chemistry journal article supplement (doi:10.1039/c5tc00963d), 2015-01-01
Supplement: c5tc00963d1.pdf [file c5tc00963d1.pdf]

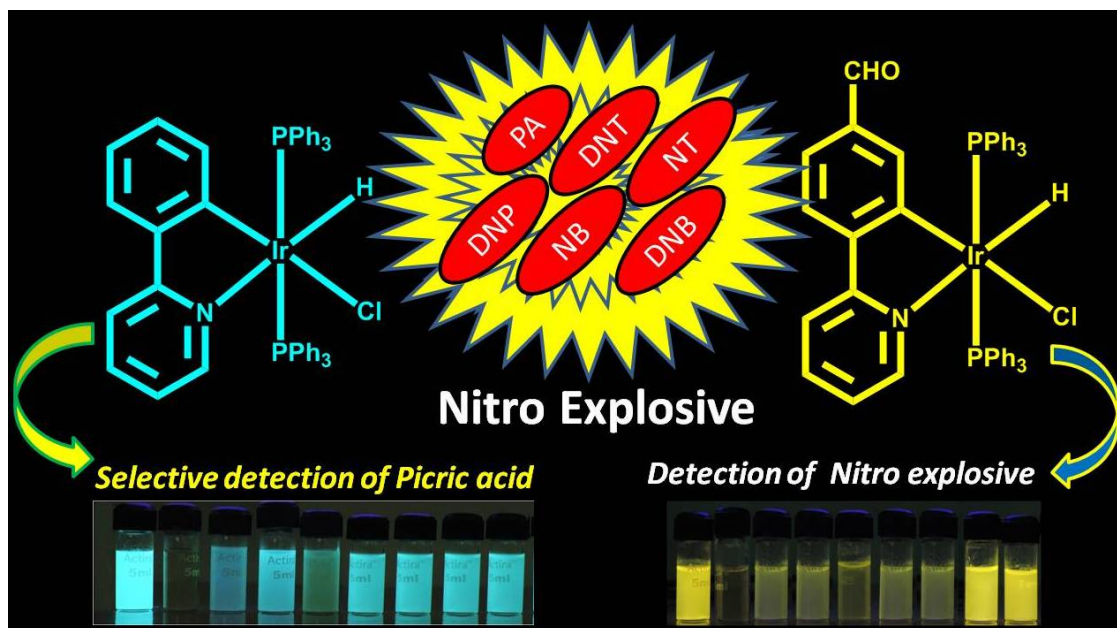

## Highly Sensitive Explosive Sensing by “Aggregation Induced Phosphorescence” Active Cyclometalated Iridium(III) Complexes

Parvej Alam,<sup>a</sup> Gurpreet Kaur,<sup>b</sup> Vishal kachwal,<sup>a</sup> Asish Gupta,<sup>c</sup> Angshuman Roy Chaudhury <sup>b</sup>  
and Inamur Rahaman Laskar<sup>\*a</sup>

jk  
ir57a  
PROTON CDCl3 /opt/topspin nmrsu 57

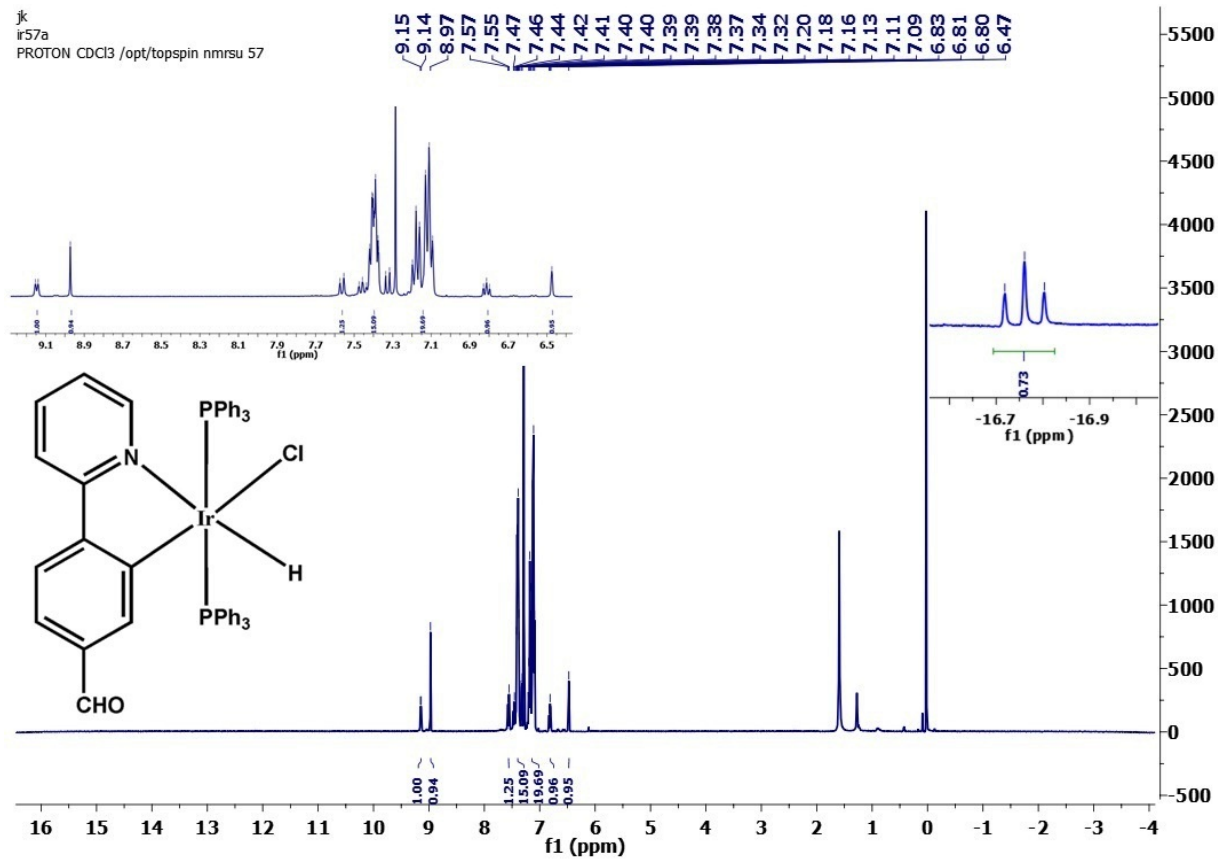

a

jk  
ir57a  
Cl3CPD CDCl3 /op topspin nmrsu 57

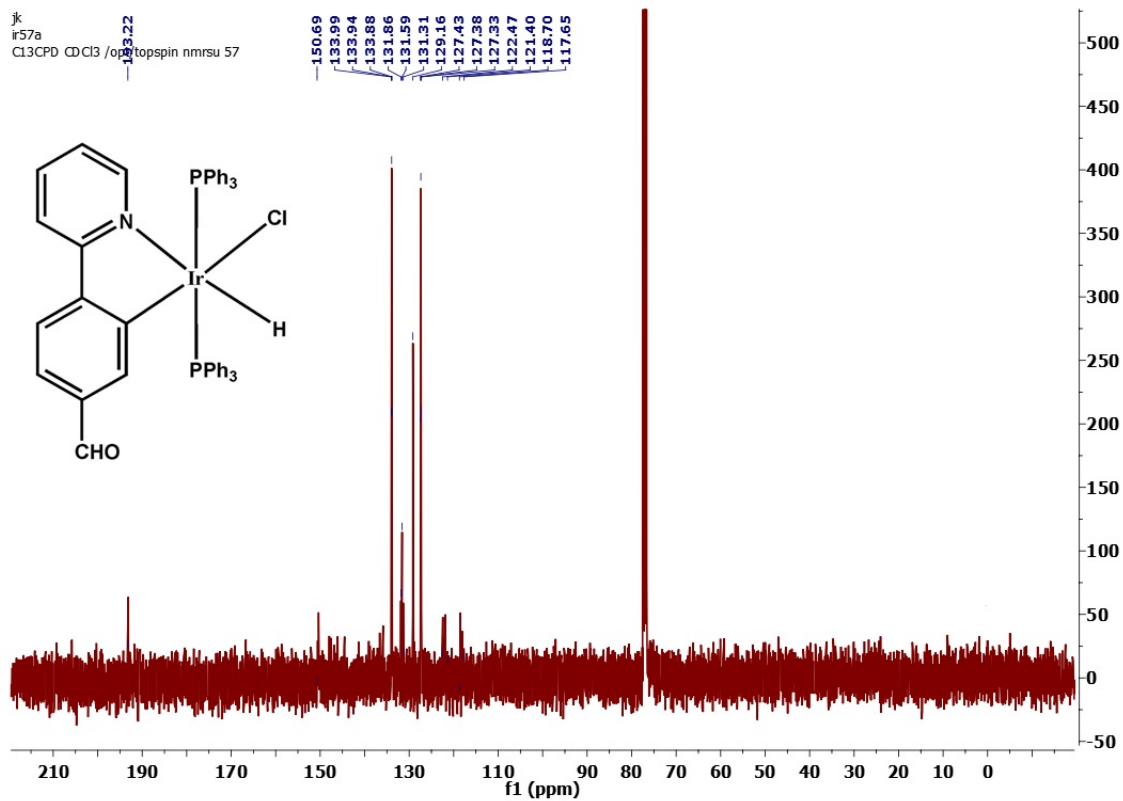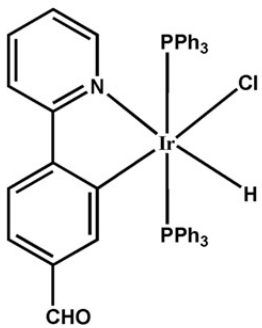

b

jk  
ir57a  
F31CPD CDCl3 /opt/topspin nmr57

7.93

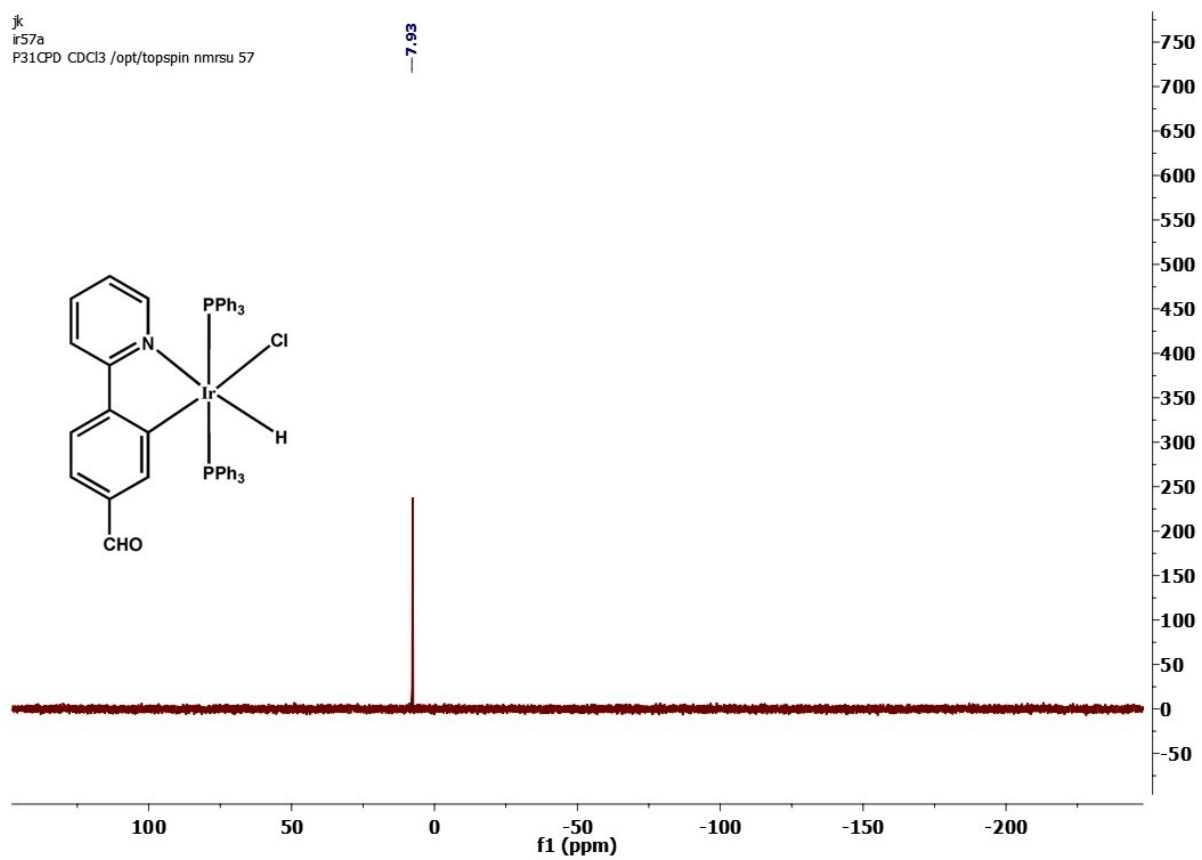

c

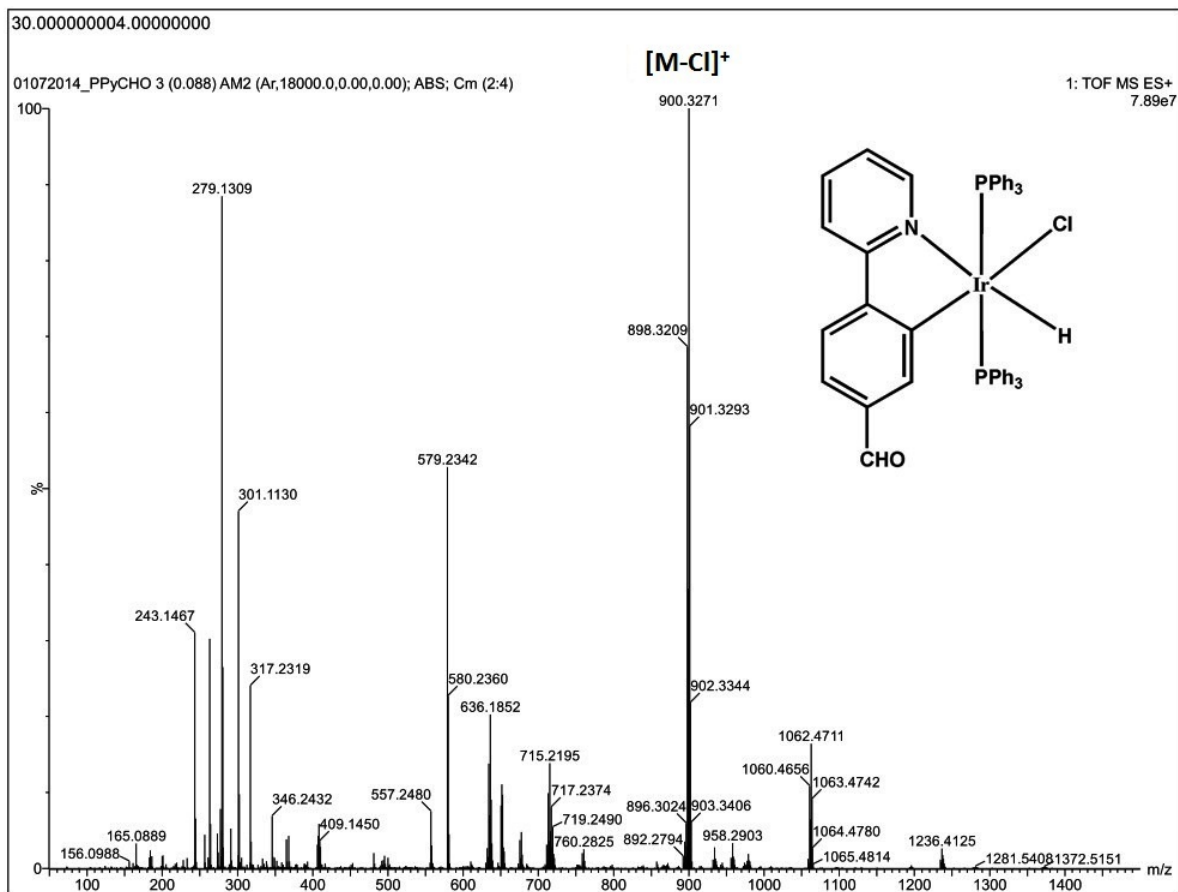

d

**Fig. S1** (<sup>1</sup>H, <sup>31</sup>P, <sup>13</sup>C) NMR spectra and HRMS (a, b, c and d), respectively for **1**.

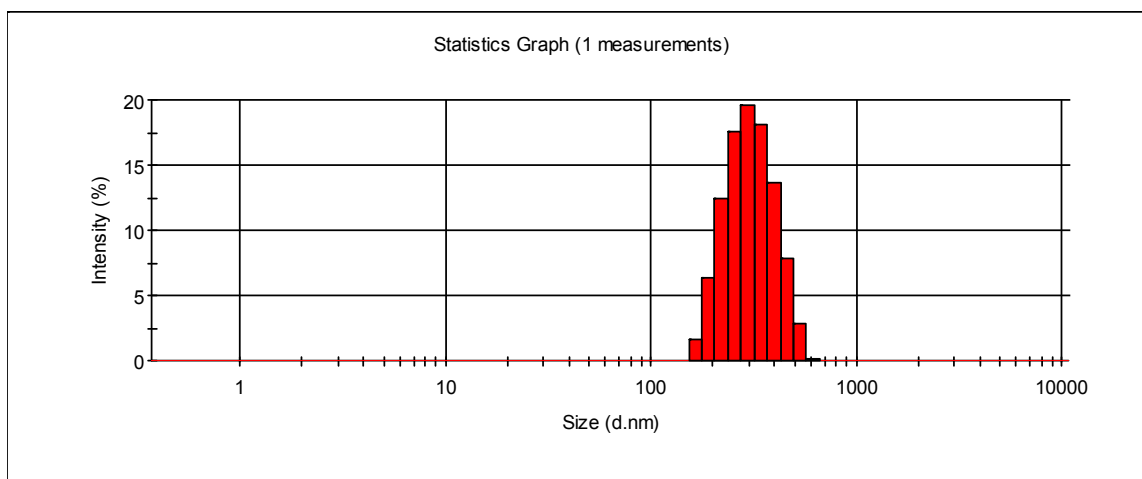

**Fig. S2** Particle size distribution of nano-aggregates of **1** in a THF/water mixture with a 90% water fraction.

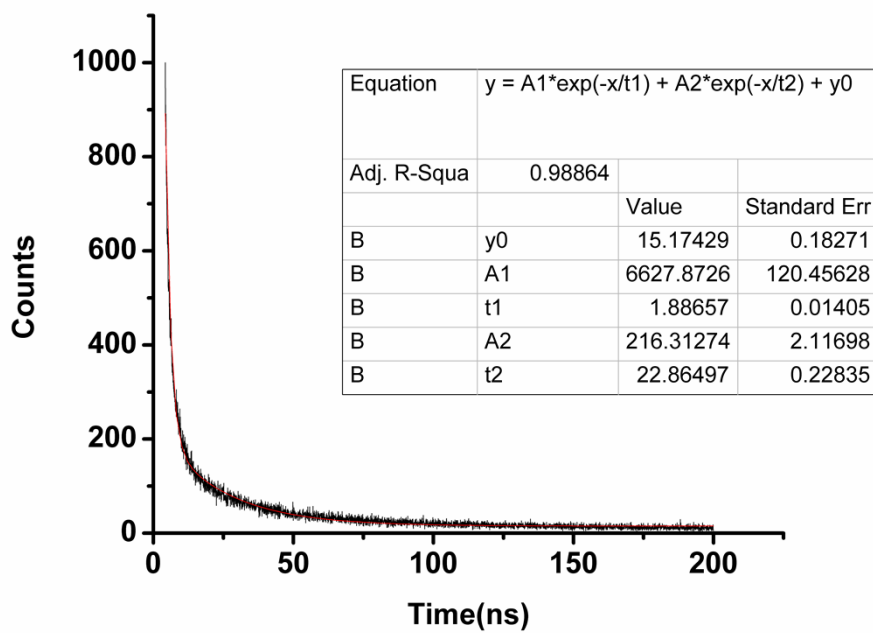

a

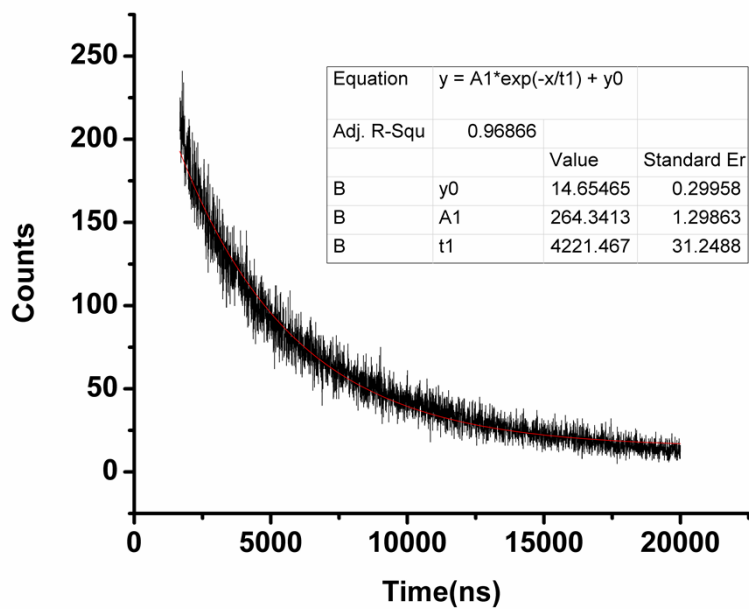

b

**Fig. S3** Photoluminescence lifetime decay curves (a) in THF and (b) in  $f_w=90\%$  for **1** (the red line is the fitting curve).

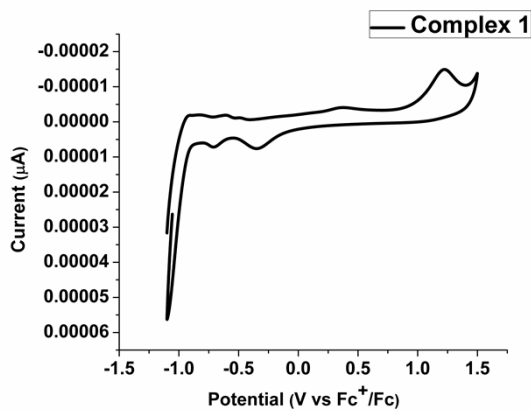

a

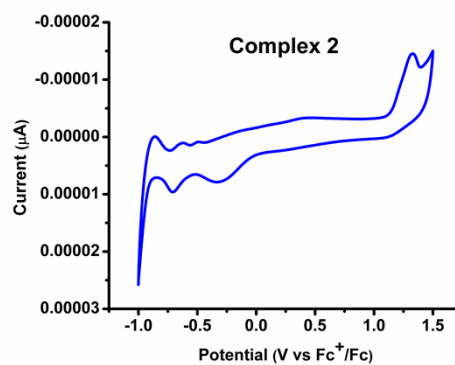

b

**Fig. S4** Cyclic voltammogram of **1** (a) and of **2** (b) respectively, recorded in CH<sub>3</sub>CN (ACN) at a scan rate of 0.05 V s<sup>-1</sup>

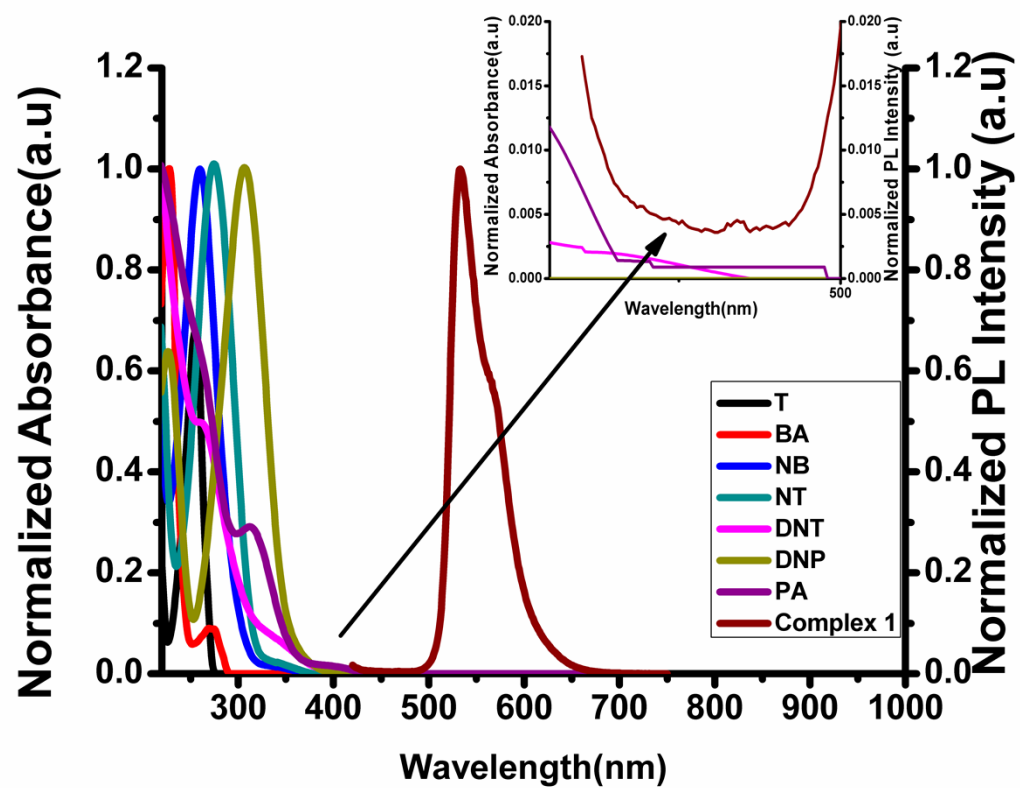

a



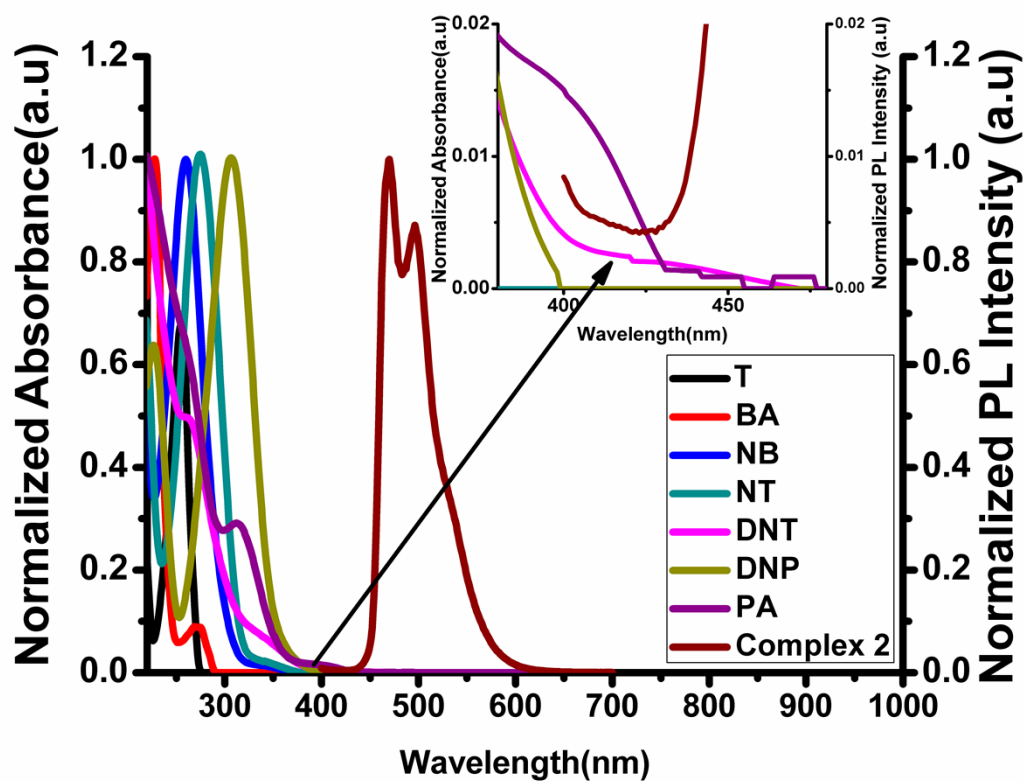

b

**Fig. S5** (a) Absorption spectra of different aromatic compounds and emission spectra of **1** (b) Absorption spectra of different aromatic compounds and emission spectra of **2**, in THF. The spectral overlap between the emission of **1** and **2** and the absorption of aromatic compounds was shown in inset.

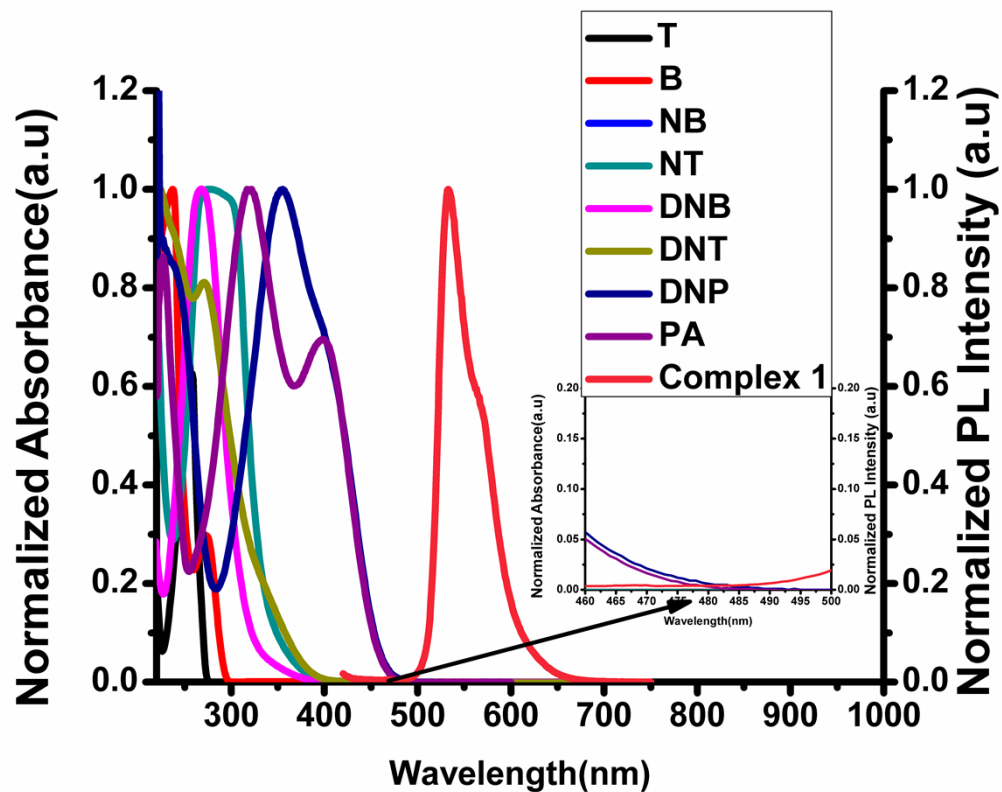

**Fig. S6** Absorption spectra of different aromatic compounds and emission spectra of **1** in THF–water ( $v/v = 1: 9$ ) mixtures. The spectral overlap between the emission of **1** and the absorption of aromatic compounds was shown in inset.

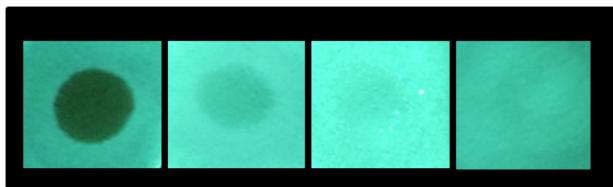

**Fig. S7** Luminescent photographs of paper plates impregnated by **2** against different concentrations of PA: (a);  $10^{-3}$ , (b);  $10^{-6}$ , (c);  $10^{-9}$ , (d);  $10^{-12}$

**Luminescence quenching titration study in THF: Water medium:**

Luminescence quenching titration studies in THF : Water (1:9, v/v) were carried out with gradual increasing PA concentration (5 $\mu$ M, 10  $\mu$ M and so on ) in a micro quartz cuvette keeping the total volume 1.5 mL. For each addition, at least three fluorescence spectrums were recorded at 298K to obtain concordant value. The  $\lambda_{ex}$  was chosen 400 nm and 385 nm for **1** and **2**, respectively with 3 nm slit width.

#### Detection limit calculations experimental procedure <sup>1,2</sup>

To determine the Signal/Noise ratio, the emission intensity of both complexes in THF : Water (1:9, v/v) without PA was measured by 10 times and the standard deviation of blank measurements was determined.

The detection limit is then calculated with the following equation.

**Detection limit =  $3\sigma/m$** ; where  $\sigma$  is the standard deviation of blank measurements,  $m$  is the slope between the plot of PL intensity versus sample concentration.

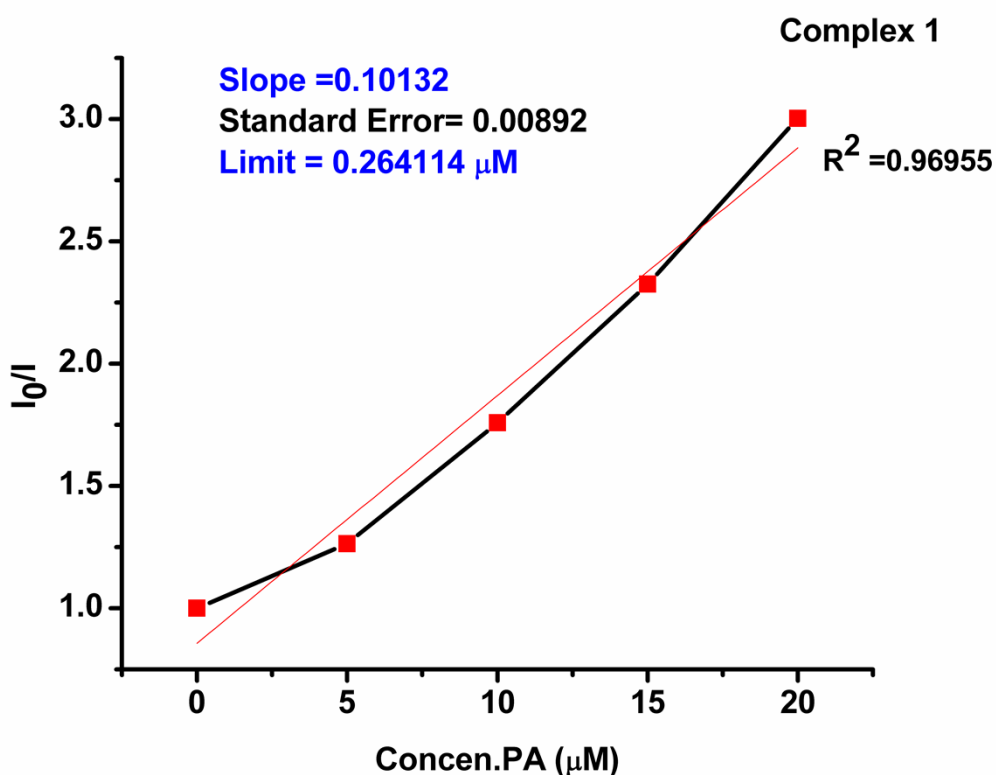

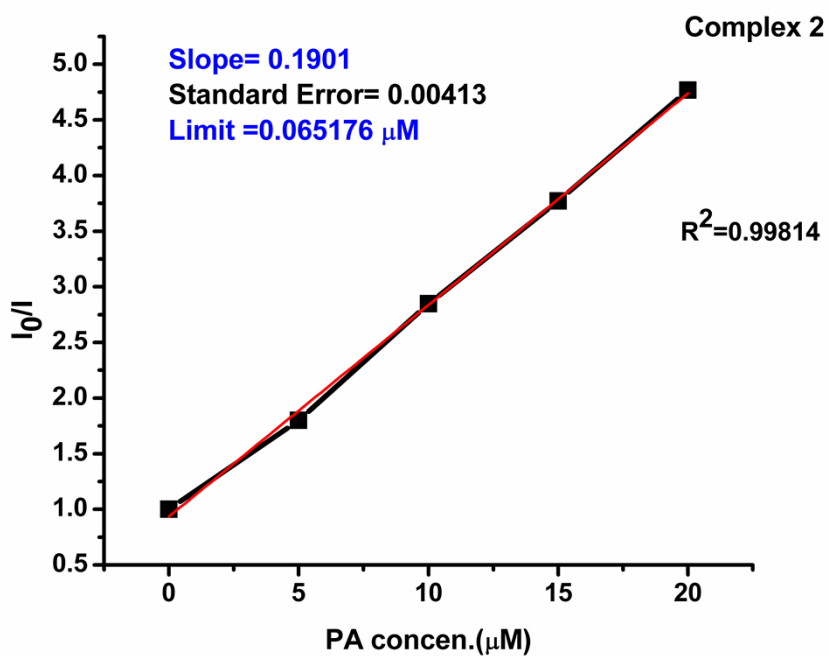

References :

1. Mi-H. Yang, P. Thirupathi, and K.-H. Lee, *Org. Lett.*, 2011, **13**, 5028. (b) D.En, Y.Guo, B.-T. Chen, B.Dong and M.-J. Peng, *RSC Adv.*, 2014, **4**, 248; (c) L. N. Neupane, J. M.Kim, C. R.Lohani and K.-H. Lee, *J. Mater. Chem.*, 2012, **22**, 4003.

2. S. Kaur, V. Bhalla, V.Vij, M. Kumar, *J. Mater. Chem. C*, 2014, **2**, 3936.
